# Supplementary material
Source: PubMed Central journal article supplement (PMC9516790)

# Protein Correlations in Cases, BQC-19

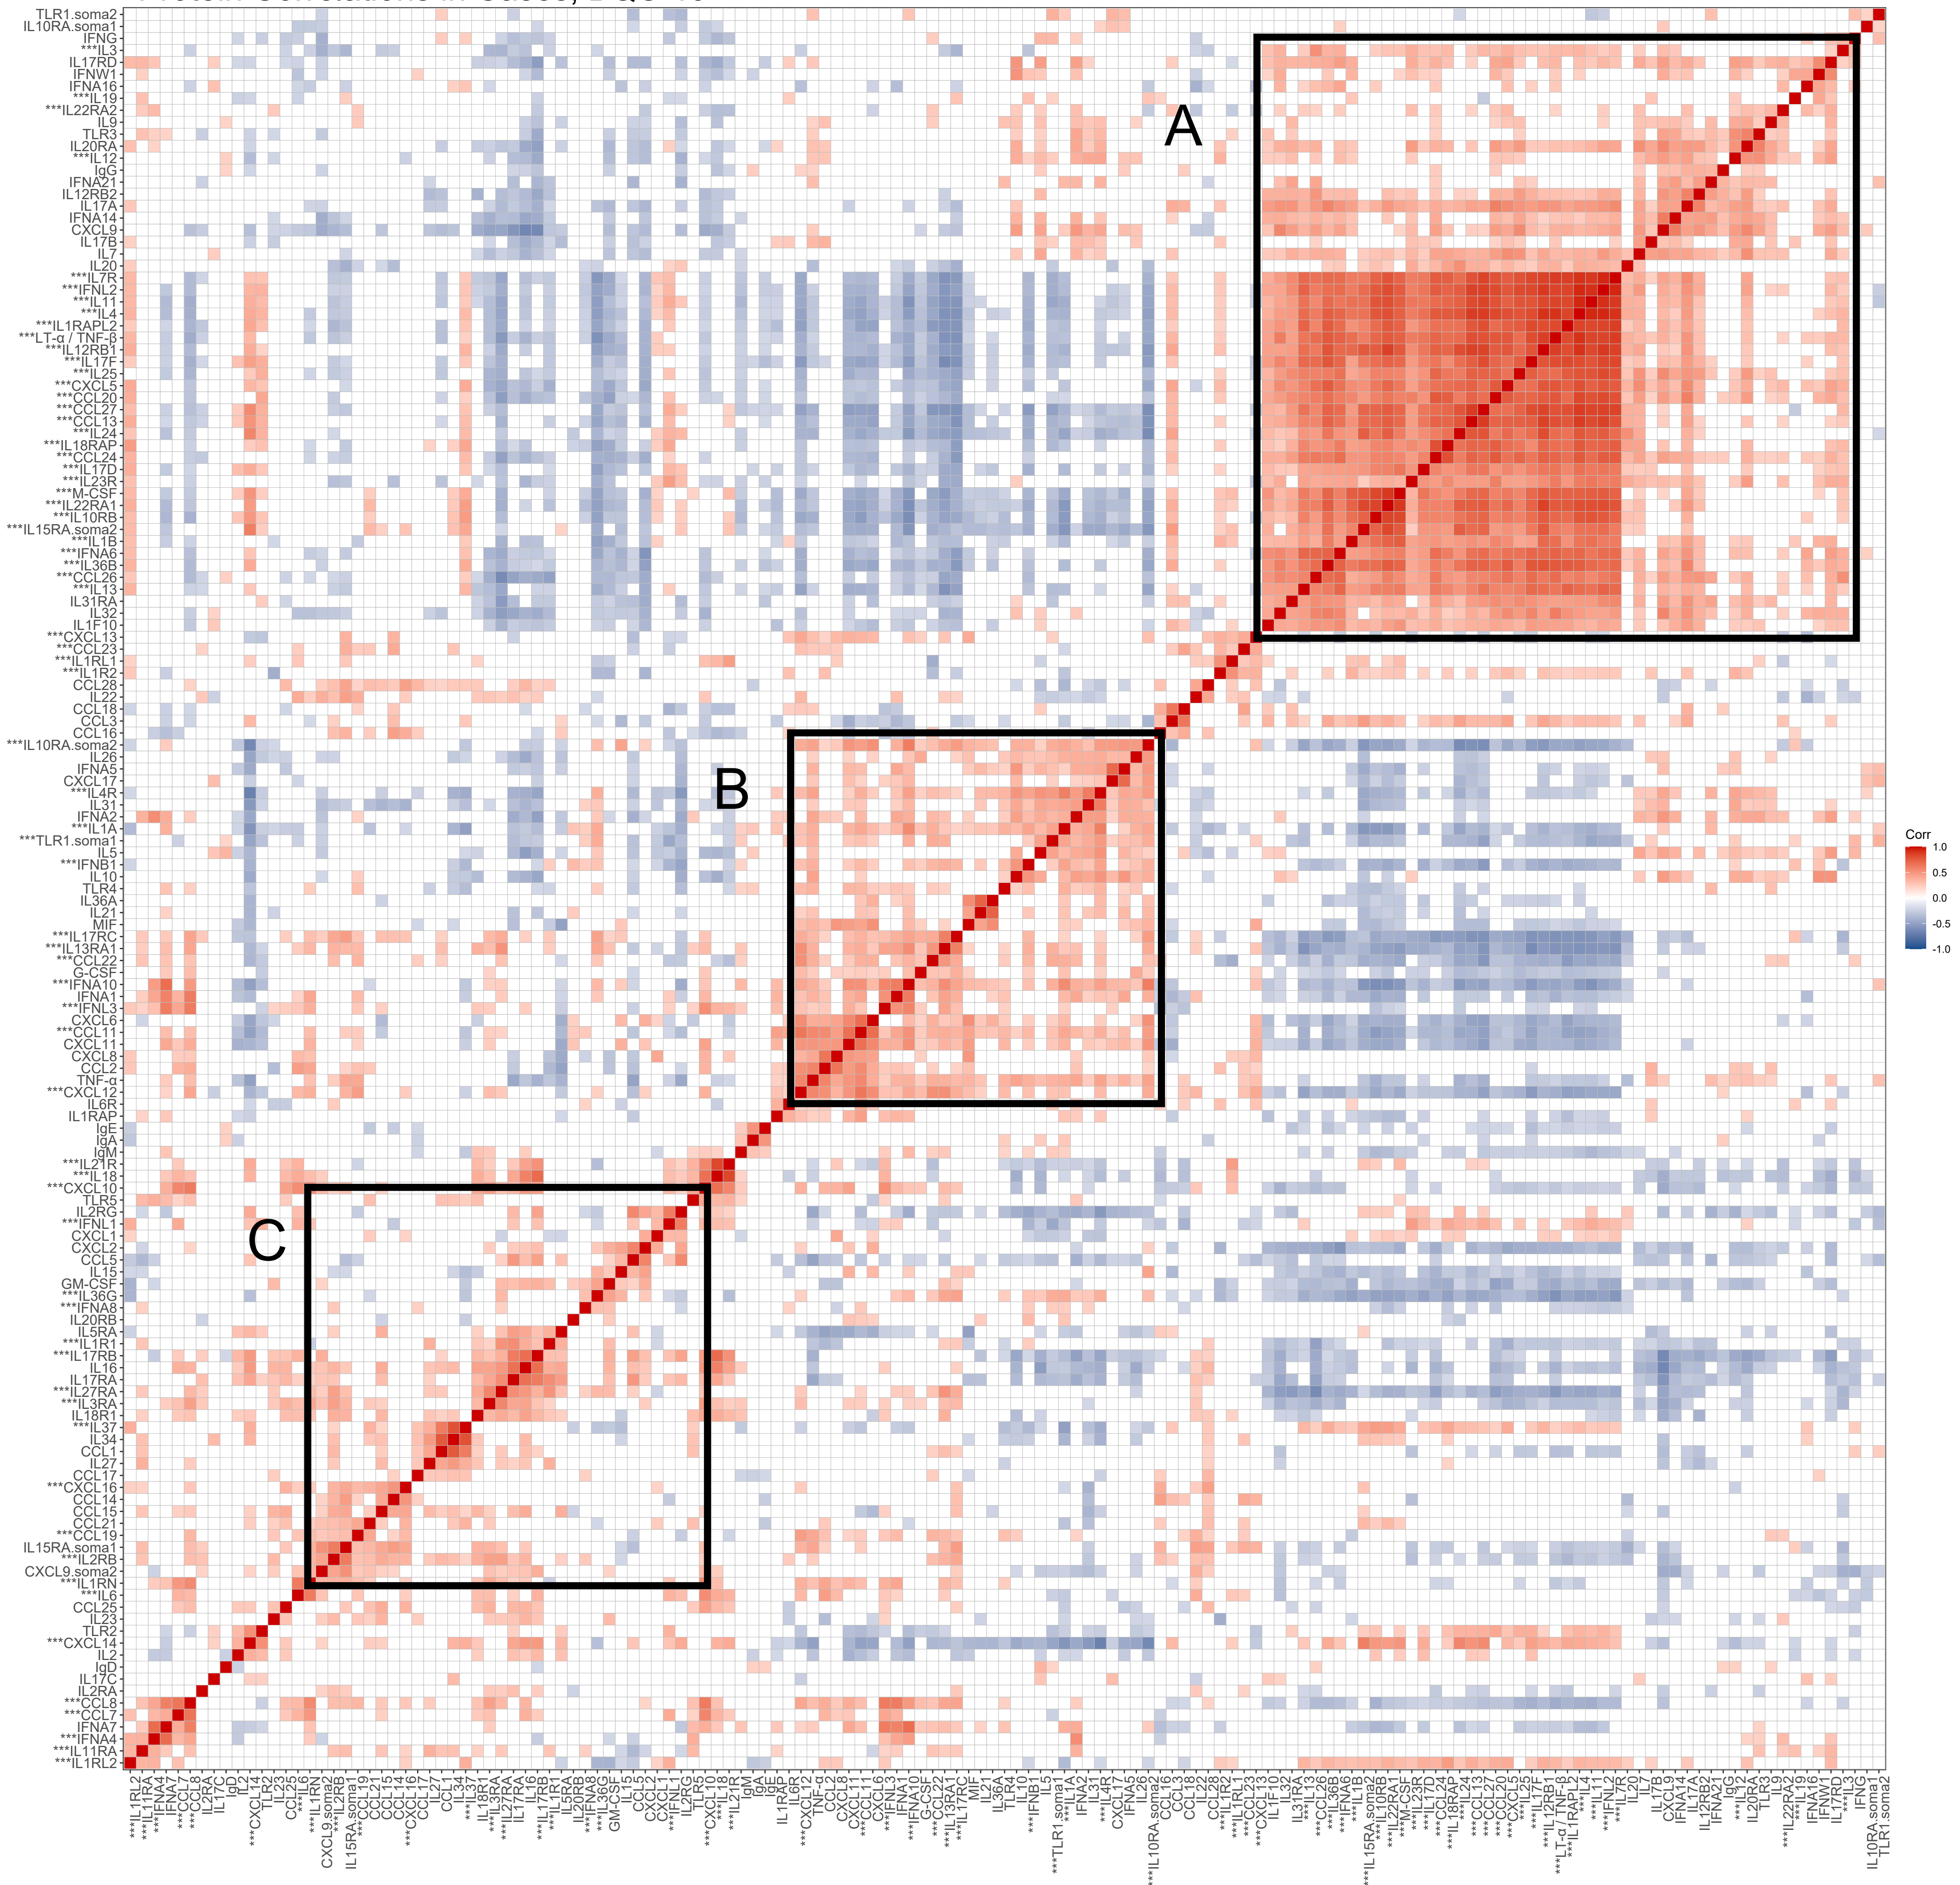



# Protein Correlations in Cases, Mount Sinai Biobank

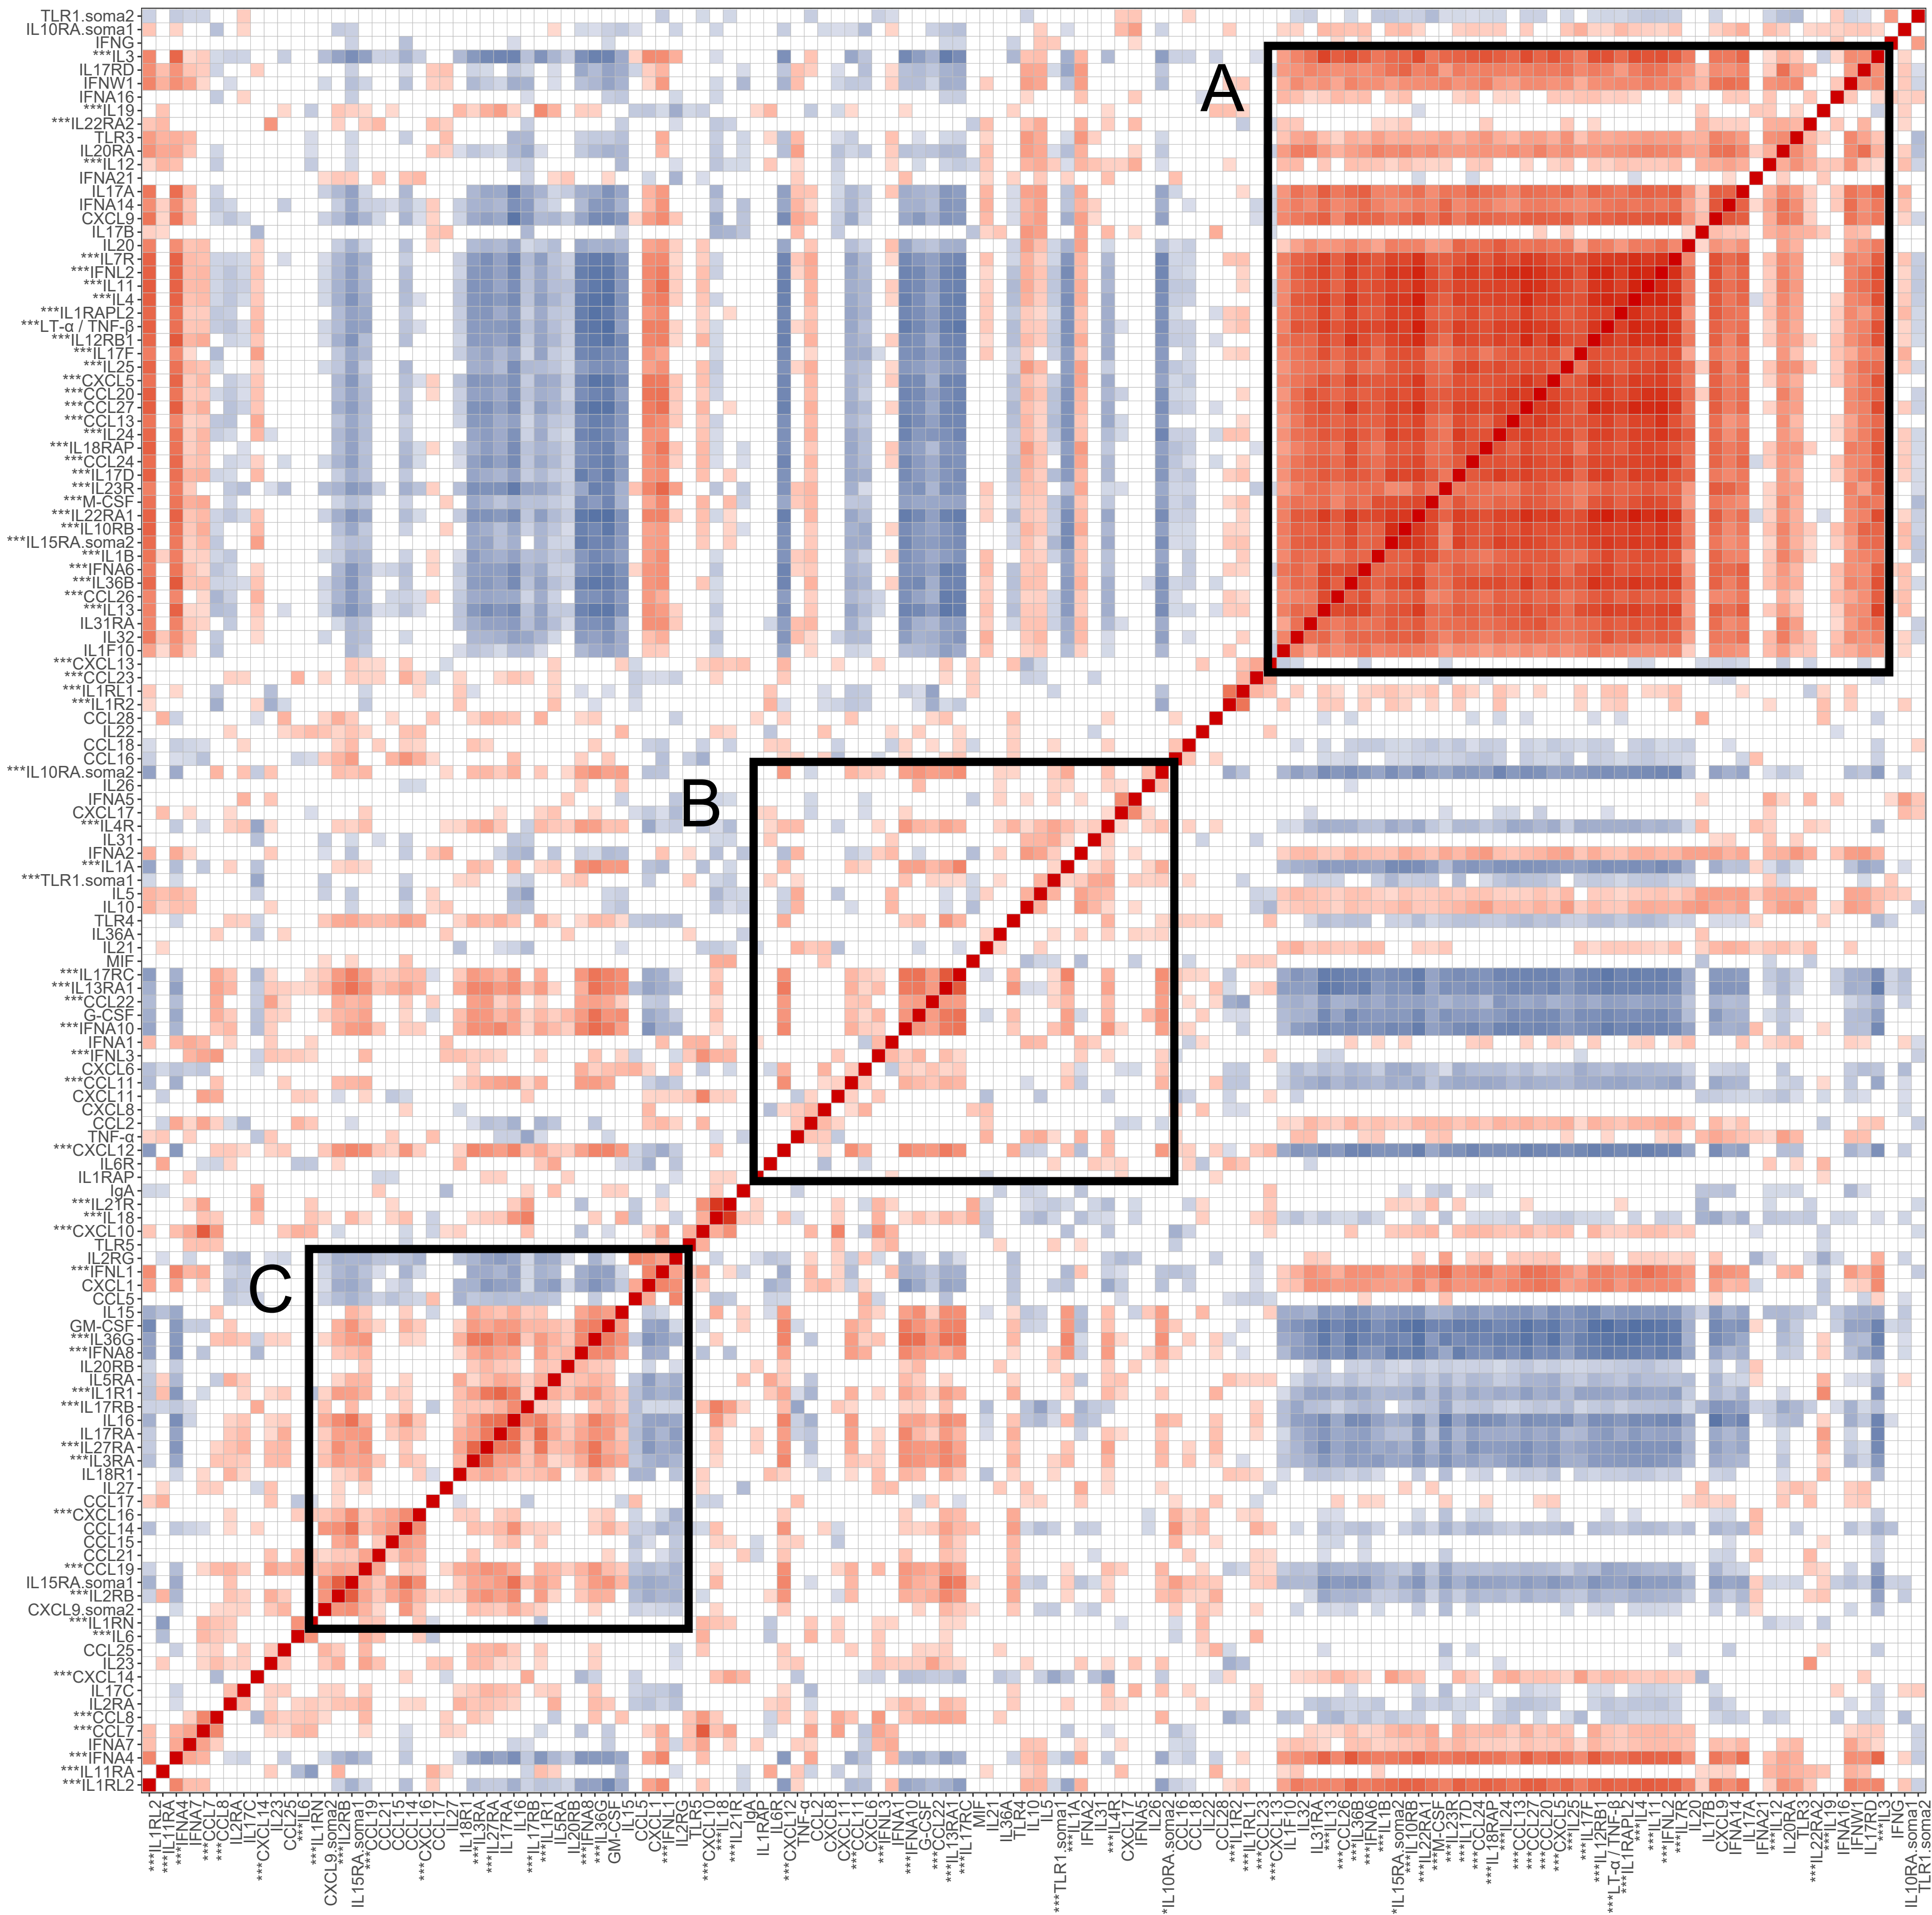

# Protein Correlations in Controls, Mount Sinai Biobank

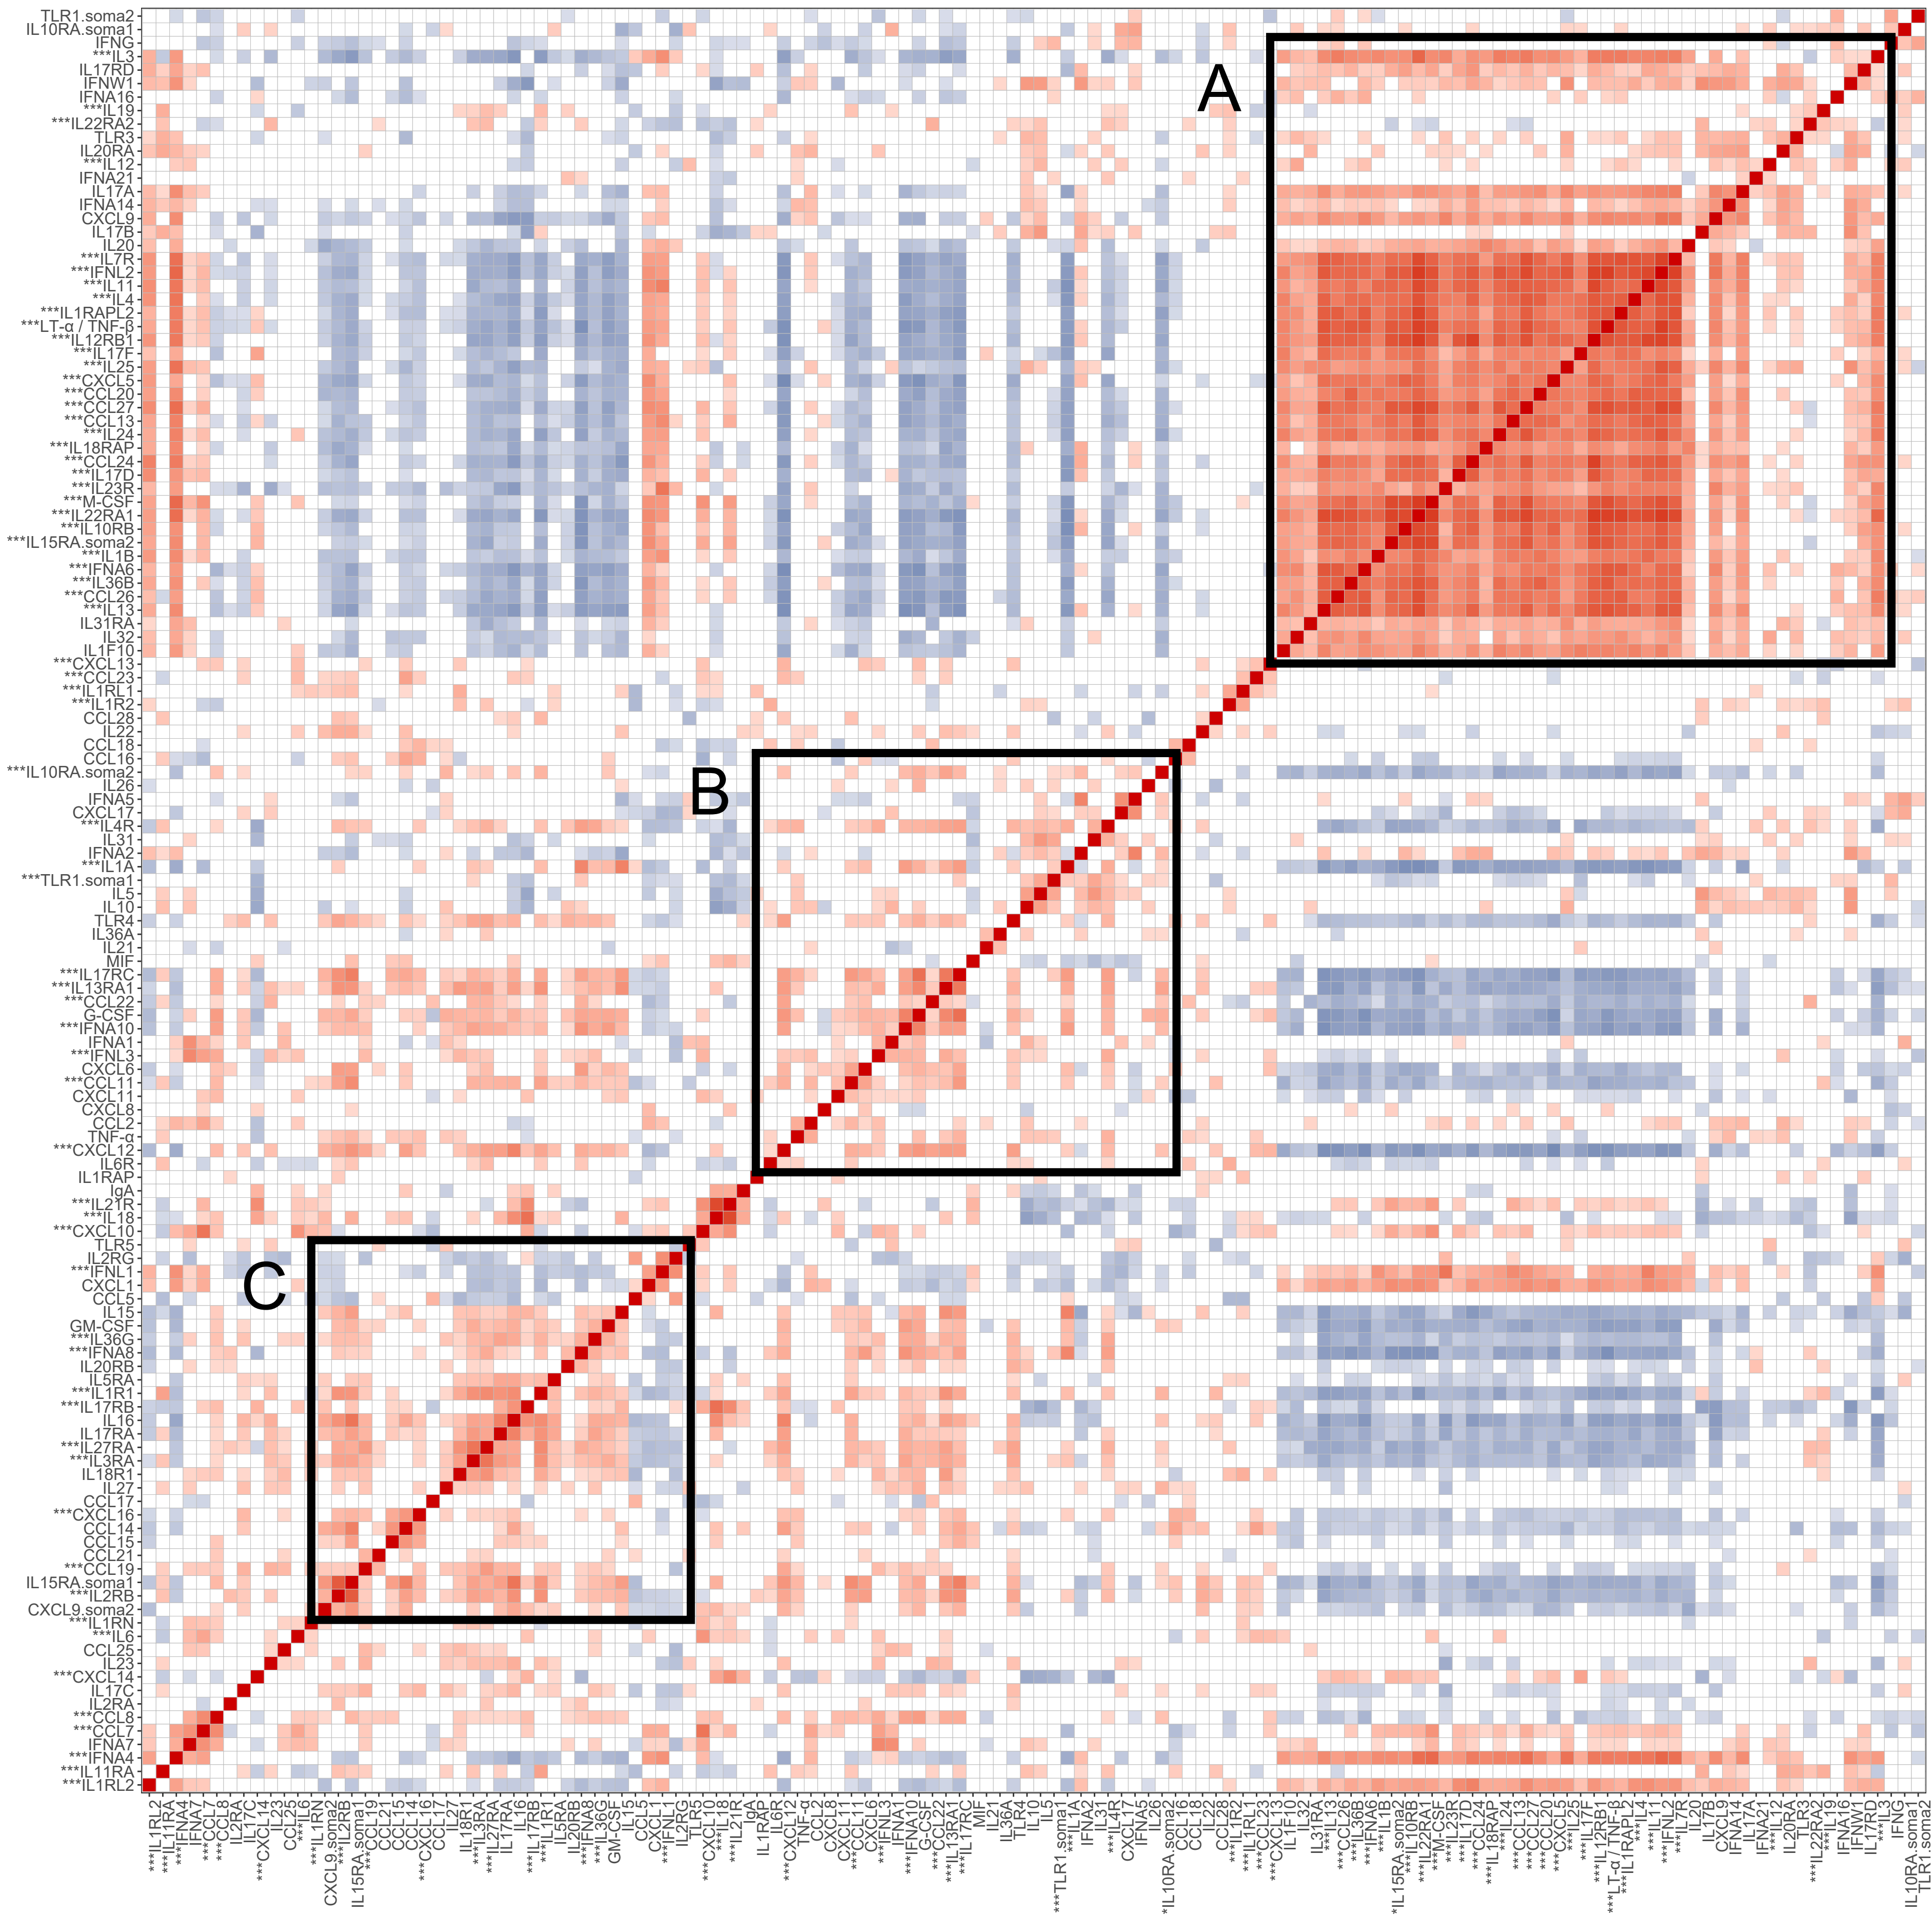

Supplement: 12014_2022_9371_MOESM3_ESM.pdf [file 12014_2022_9371_MOESM3_ESM.pdf]
